# Supplementary material for: Bioassay-Guided Isolation of Broad-Spectrum Fungicidal Active Compound from Artemisia ordosica
Source: MDPI journal article supplement (doi:10.3390/metabo11090629), 2021-09-17
Supplement: s1 [file s1]

Supplemented materials:

**Table S1.** The minimum inhibitory concentration of TDDE against different bacteria.

| Strain name                                   | Minimum Inhibitory Concentration (MIC,<br>μg/mL) |
|-----------------------------------------------|--------------------------------------------------|
| <i>P.syringae</i> pv. <i>actinidiae</i>       | 34.593                                           |
| <i>E. carotovora</i>                          | 59.184                                           |
| <i>B. cereus</i>                              | 68.495                                           |
| <i>X. campestris</i> pv. <i>jugiandis</i>     | 73.074                                           |
| <i>E. carotovora</i> subsp. <i>carotovora</i> | 62.165                                           |

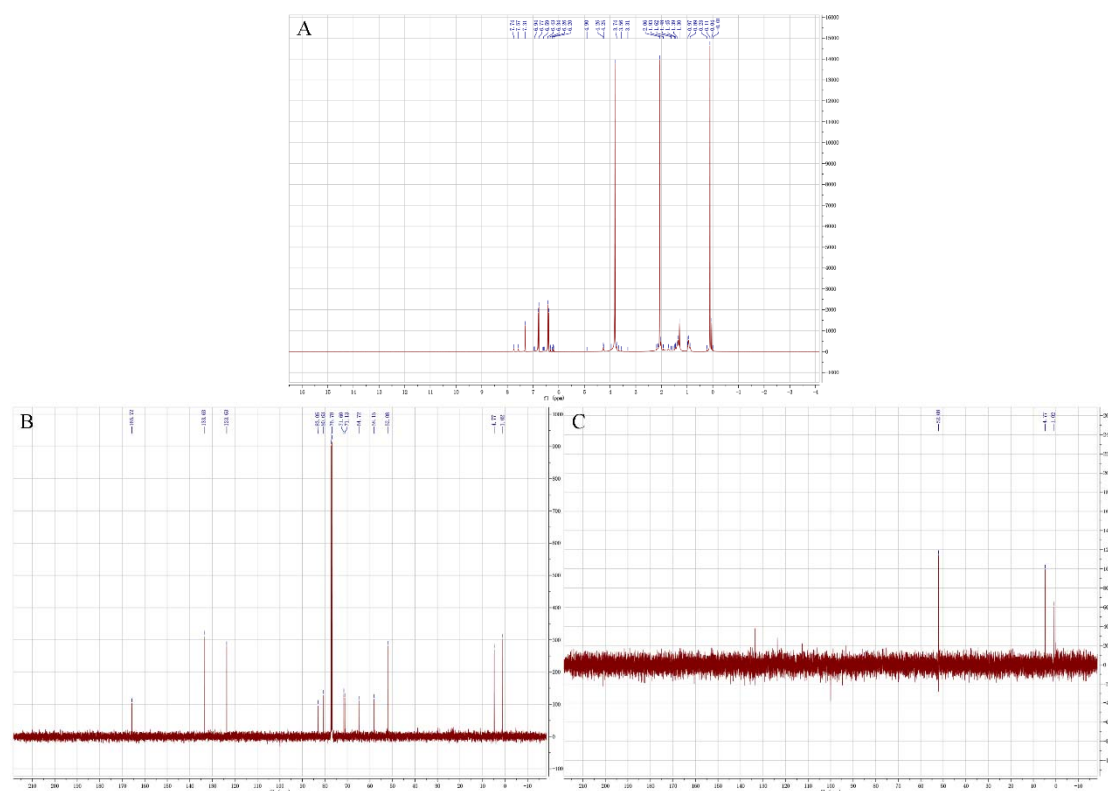

**Figure S1.** The H-NMR and C-NMR of TDDE. **A.** H-NMR; **B.** C-NMR; **C.** DEPT. NMR, nuclear magnetic resonance; DEPT, distortionless enhancement by polarization transfer.

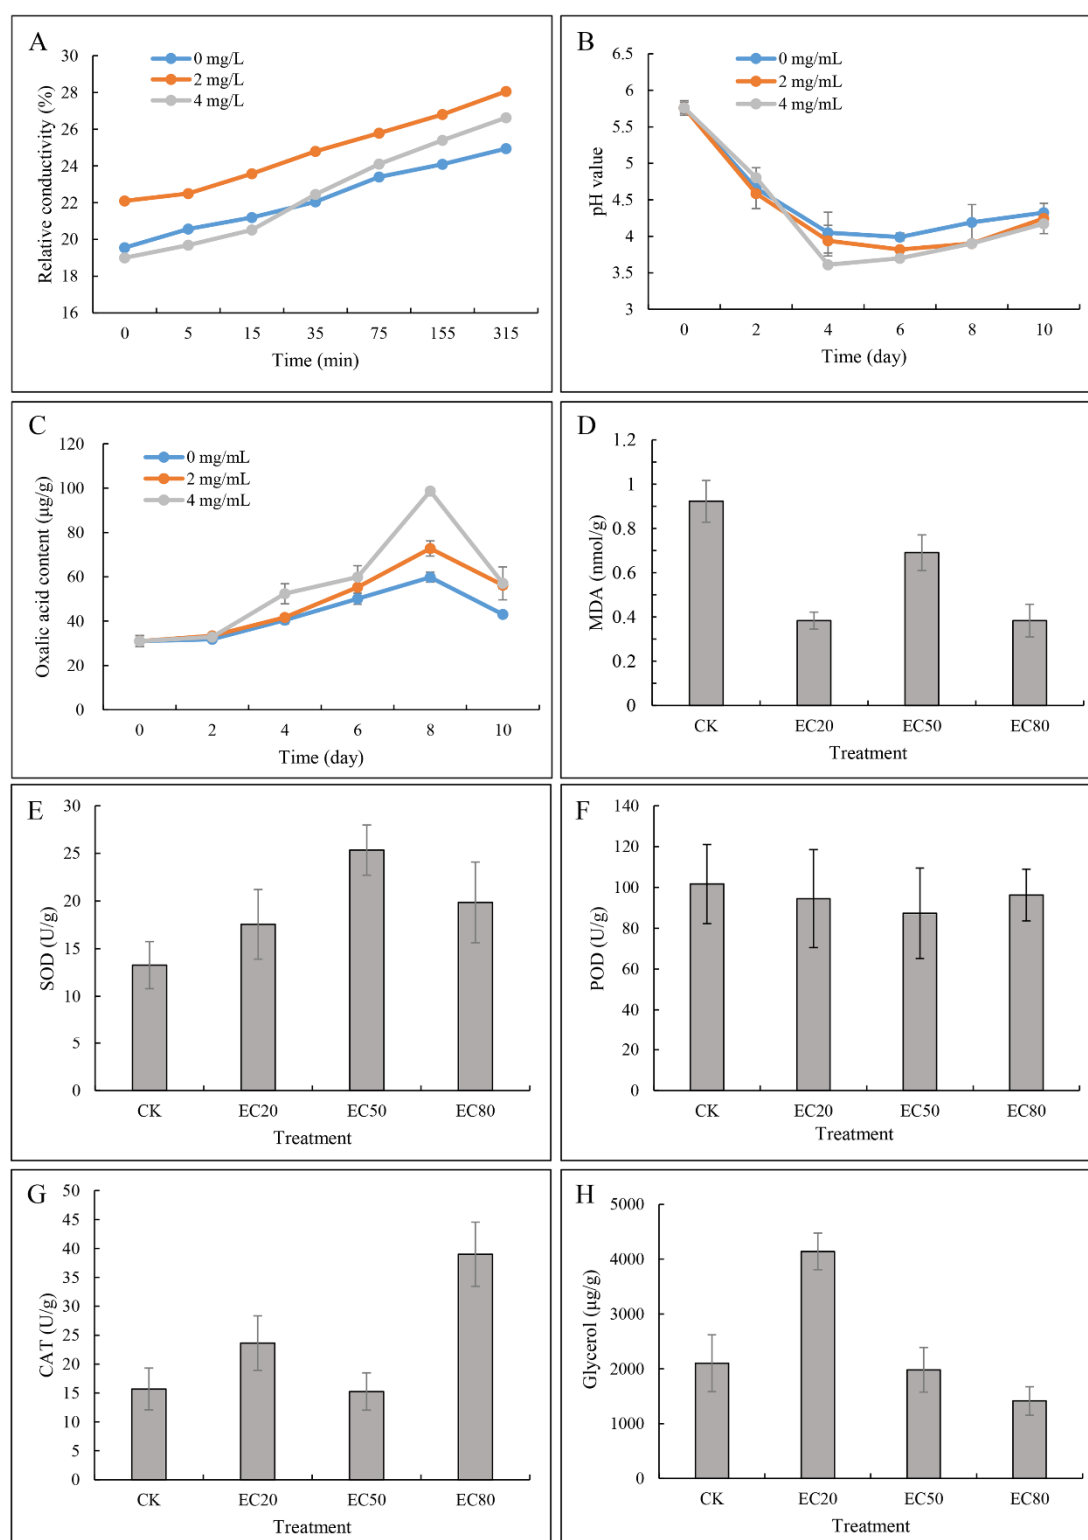

**Figure S2.** Effects of TDDE on *B. cinerea* physiological activities. **A.** Relative conductivity; **B.** pH value; **C.** Oxalic acid content; **D.** Malondialdehyde (MDA) content; **E.** Superoxide dismutase (SOD) activity; **F.** Peroxidase (POD) activity; **G.** Catalase (CAT) activity; **H.** Glycerol content. CK, blank control; EC20-80, different concentration of TDDE.
